# Supplementary material for: Anticoagulation Favors Thrombus Recanalization and Survival in Patients With Liver Cirrhosis and Portal Vein Thrombosis: Results of a Meta-Analysis
Source: Springer Nature journal article supplement (doi:10.1007/s12325-020-01550-4), 2020-11-05
Supplement: MOESM1 [file 18558454]

**APPENDIX**

The search items were “(portal vein thrombosis) OR (portal venous thrombosis) OR (portal vein thrombus) OR (portal venous thrombus) OR (portal vein obstruction) OR (portal venous obstruction) OR (portal vein occlusion) OR (portal venous occlusion) OR (thrombotic portal vein) OR (thrombosed portal vein) OR (occluded portal vein) OR (occlusive portal vein) OR (obstructed portal vein) OR (obstructive portal vein) OR (portal cavernoma) OR (cavernous transformation of portal vein) OR (mesenteric vein thrombosis) OR (mesenteric venous thrombosis) OR (mesenteric vein obstruction) OR (mesenteric venous obstruction) OR (mesenteric vein occlusion) OR (mesenteric venous occlusion) OR (splenic vein thrombosis) OR (splenic venous thrombosis) OR (splenic vein obstruction) OR (splenic venous obstruction) OR (splenic vein occlusion) OR (splenic venous occlusion) OR (splanchnic vein thrombosis) OR (splanchnic venous thrombosis) OR (splanchnic vein obstruction) OR (splanchnic venous obstruction) OR (splanchnic vein occlusion) OR (splanchnic venous occlusion) OR (abdominal vein thrombosis) OR (abdominal venous thrombosis) OR (abdominal vein obstruction) OR (abdominal venous obstruction) OR (abdominal vein occlusion) OR (abdominal venous occlusion) OR (portosplenomesenteric vein thrombosis) OR (portosplenomesenteric venous thrombosis) OR (portosplenomesenteric vein occlusion) OR (portosplenomesenteric venous occlusion) OR (portosplenomesenteric vein obstruction) OR (portosplenomesenteric venous obstruction)’’ AND ‘‘(cirrhotic) OR (cirrhosis)’’ AND “(anticoagulant) OR (anticoagulants) OR (anticoagulation) OR (warfarin) OR (vitamin K antagonist) OR (vitamin K antagonists) OR (low molecular weight heparin) OR (heparin) OR (enoxaparin) OR (dalteparin) OR (factor Xa inhibitor) OR (factor Xa inhibitors) OR (rivaroxaban) OR (apixaban) OR (edoxaban) OR (betrixaban) OR (argatroban) OR (thrombin inhibitor) OR (thrombin inhibitors) OR (dabigatran)”.
