# Supplementary material for: Anticoagulation Favors Thrombus Recanalization and Survival in Patients With Liver Cirrhosis and Portal Vein Thrombosis: Results of a Meta-Analysis
Source: Springer Nature journal article supplement (doi:10.1007/s12325-020-01550-4), 2020-11-05
Supplement: MOESM3 [file 18558454]

| **Supplementary table 2. Characteristics of patients** | | | | | | | | | |
| --- | --- | --- | --- | --- | --- | --- | --- | --- | --- |
| **First author (year)** | **Severity of liver dysfunction** | **Excluding HCC** | **Features of PVT** | **Excluding CTPV** | **Excluding isolated thrombosis within SMV or SV** | **Excluding patients who received antiplatelet treatment** | **Excluding patients who received thrombolytic treatment** | **Interval between diagnosis of PVT and initiation of AT** | **Baseline gastroesophageal varices** |
| Francoz (2005) | CP class A/B/C: 2/13/4 in AT group, 2/6/2 in no AT group;  MELD score: 12.8±4.3 in AT group, 11.8±6.2 in no AT group | No | NA | No | No | No | No | NA | Esophageal varices F1/F2/F3: 5 (23.5%)/8 (42.1%)/4 (21.1%) in AT group; 1 (10%)/5 (50%)/2 (20%) in no AT group |
| Amitrano (2010) | CP class A/B+C: 15/13 | Yes | Acute/subacute PVT | Yes | No | No | No | Median: 4 months | NA |
| Butera (2010) | NA | No | NA | No | No | No | No | NA | Esophageal varices F1/F2/F3: 6 (21.4%)/6 (21.4%)/4 (14.3%) |
| Bento (2011) | NA | Yes | Chronic PVT | No | No | No | No | NA | NA |
| Delgado (2012) | CP class A/B/C: 25/21/9;  MELD score: 12.8±3.8 | No | Acute/subacute PVT or thrombosis progression | Yes | No | No | No | <14 days/>14 days: 35 (63.6%)/20 (36.4%) | NA |
| Senzolo (2012) | CP class A/B/C: 11/16/8 in AT group, 5/9/7 in no AT group;  MELD score: 12.6±3.7 in AT group, 13.7±3.6 in no AT group | Yes | NA | No | Yes | Yes | No | <6 months/6-12 months/>12 months: 17 (51.5%)/8 (24.2%)/8 (24.2%) | Gastroesophageal varices: 32 (91.4%) in AT group; 20 (95.2%) in no AT group |
| Caracciolo (2013) | CP class A and B: all | Yes | NA | Yes | No | No | No | NA | High-risk esophageal varices and active GEVB were excluded |
| Takatori (2013) | NA | No | NA | No | No | No | No | NA | NA |
| Werner (2013) | NA | No | New onset PVT | Yes | No | No | No | NA | G2 or more esophageal varices: 14 (50%) |
| Chung (2014) | CP class A/B/C: 6/8/0 in AT group, 7/6/1 in no AT group | No | NA | No | No | No | No | <6 months/>6 months: 12 (85.7%)/2 (14.3%) | NA |
| Risso (2014) | NA | No | NA | No | No | No | No | NA | NA |
| Cheruvathur (2015) | NA | No | NA | No | No | No | No | NA | NA |
| Cui (2015) | NA | Yes | Acute PVST | Yes | No | Yes | No | NA | Esophageal varices: 30 (88.2%) in AT group; 28 (90.3%) in no AT group |
| Gheorghe (2015) | NA | No | NA | No | No | No | No | NA | NA |
| Inao (2015) | NA | No | NA | No | No | No | No | NA | NA |
| Chen (2016) | CP class A/B/C: 6/17/5 in AT group, 8/21/2 in no AT group;  MELD score: 9.9±4.04 in AT group, 8.9±3.01 in no AT group | Yes | NA | Yes | Yes | No100 | Yes | <1 month/1-3 month/>3 month: 13 (43.3%)/12 (40%)/5 (16.7%) | Esophageal varices G1/G2/G3: 3 (10%)/15 (50%)/12 (40%) in AT group; 6 (16.7%)/9 (25%)/18 (50%) in no AT group |
| Sbrancia (2016) | MELD score: 13±4 | No | NA | No | No | No | No | NA | NA |
| Tonon (2016) | NA | No | Acute PVT | Yes | No | No | No | NA | NA |
| Fujiyama (2017) | NA | No | NA | No | No | No | No | NA | Esophagogastric varices: 13 (41.1%) |
| Artaza (2018) | CP class A/B/C: 18/12/2;  MELD score: 9.7±3.4 | Yes | Recent PVT  (when imaging in the previous 6 months demonstrated no PVT.) | Yes | Yes | No | No | Median (range): 2 (0-16) weeks;  7 days/7-21 days/>21 days: 16 (50%)/9 (28%)/7 (22%) | NA |
| Kwon (2018) | CP class A/B/C: 45/42/4 | No | Acute PVT: 30 (33.0%); Thrombosis progression: 44 (48.4%); Chronic and stable PVT: 17 (18.7%) | No | No | No | No | Median (range): 8.9 (0–125.9) months | Gastroesophageal varices: 82 (90.1%) |
| La Mura (2018) | CP class A/B and C: 49/14 | Yes | NA | No | No | No | No | NA | Esophageal varices: Small/large varices: 34 (54%)/17 (27%); Red color signs: 9 (14%);  Fundal varices: 11 (18%) |
| Nagaoki (2018) | CP class A/B/C: 29/16/5 | No | NA | No | No | No | No | Median (range): 3.4 (1-53) months | Esophageal varices: 42 (84%) |
| Scheiner (2018) | CP class A/B/C: 14/19/18;  MELD score: 13.6±6.5 | Yes | NA | No | No | No | No | <10 days: 12 (23.5%) | Gastroesophageal varices: 39 (76.5%) |
| Tiwari (2018) | NA | No | NA | No | No | No | No | NA | NA |
| Bergere (2019) | CP class A/B/C: 19/15/6 | No | NA | Yes | No | No | No | <1 month/>1 month: 32 (80%)/8 (20%) | Gastroesophageal varices: 30 (76.9%) |
| Noronha Ferreira (2019) | CP class A/B/C: 12/16/9 in AT group, 9/18/16 in no AT group;  MELD score: 14±6 in AT group, 16±7 in no AT group | No | CTPV: 1 (2.7%) | No | Yes | No | No | <1 month/1–3 months/3–6 months/7–12 months/>12 months: 14 (37.8%)/13 (35.1%)/3 (8.1%)/3 (8.1%)/4 (10.8%) | Esophageal varices: 33 (89.2%) in AT group; 36 (92.3%) in no AT group  Gastric varices: 9 (24.3%) in AT group; 11 (28.2%) in no AT group |
| Hayama (2019) | NA | No | NA | No | No | No | No | NA | NA |
| Hayashi (2019) | NA | No | NA | No | No | No | No | ≤30 days/>31 days: 32 (62%)/20 (38%) | Esophageal varices: 51 (98.1%) |
| Pettinari (2019) | CP class A/B/C: 43/33/5 in AT group, 37/45/19 in no AT group;  MELD score≤9: 29 in AT group, 14 in no AT group | No | NA | No | No | No | No | ≤6 months/7–12 months/≥13 months: 66 (81.5%)/7 (8.6%)/8 (9.9%) | Gastroesophageal varices: 67 (82.7%) in AT group; 74 (73.3%) in no AT group |
| Rodriguez-Castro (2019) | CP class A/B/C: 27/23/15;  MELD score: 18.4±5.5 | Yes | CTPV: 8 (12.5%) | No | Yes | Yes | No | ≤6 months/>6 months: 47 (72.3%)/18 (27.7%) | Esophageal varices G1/G2/G3: 27 (42%)/21 (32%)/17 (26%)  Red wale marks: 31 (47.6%) |
| Senzolo (2019) | NA | No | NA | No | No | No | No | NA | NA |
| Tarantinoi (2019) | NA | No | NA | No | No | No | No | NA | Esophageal varices: at least 64 (70.3%) |
| **Abbreviations:** HCC: Hepatocellular carcinoma; CTPV: Cavernous transformation of portal vein; SV: Splenic vein; SMV: Superior mesenteric vein; AT: Anticoagulant therapy; CP: Child-Pugh; MELD: Model for end stage liver disease; NA: Not available. | | | | | | | | | | |
