# Supplementary material for: Anticoagulation Favors Thrombus Recanalization and Survival in Patients With Liver Cirrhosis and Portal Vein Thrombosis: Results of a Meta-Analysis
Source: Springer Nature journal article supplement (doi:10.1007/s12325-020-01550-4), 2020-11-05
Supplement: MOESM4 [file 18558454]

| **Supplementary table 3. Quality of included studies** | | | | | | | | | | |
| --- | --- | --- | --- | --- | --- | --- | --- | --- | --- | --- |
| **Studies** | **Quality Score** | **Selection (☆☆☆☆)** | | | | **Comparability (☆☆)** | | **Outcome (☆☆☆)** | | |
| Francoz (2005) | 6 | ☆ | / | ☆ | ☆ | / | ☆ | ☆ | / | ☆ |
| Amitrano (2010) | 6 | ☆ | / | ☆ | ☆ | / | / | ☆ | ☆ | ☆ |
| Butera (2010) | 4 | ☆ | / | ☆ | ☆ | / | / | / | / | ☆ |
| Delgado (2012) | 6 | ☆ | / | ☆ | ☆ | / | / | ☆ | ☆ | ☆ |
| Senzolo (2012) | 8 | ☆ | / | ☆ | ☆ | ☆ | ☆ | ☆ | ☆ | ☆ |
| Caracciolo (2013) | 9 | ☆ | ☆ | ☆ | ☆ | ☆ | ☆ | ☆ | ☆ | ☆ |
| Takatori (2013) | 5 | ☆ | / | ☆ | ☆ | / | / | ☆ | / | ☆ |
| Werner (2013) | 6 | ☆ | / | ☆ | ☆ | / | / | ☆ | ☆ | ☆ |
| Chung (2014) | 9 | ☆ | ☆ | ☆ | ☆ | ☆ | ☆ | ☆ | ☆ | ☆ |
| Risso (2014) | 6 | ☆ | / | ☆ | ☆ | / | ☆ | ☆ | / | ☆ |
| Butt (2015) | 5 | ☆ | / | ☆ | ☆ | / | / | / | ☆ | ☆ |
| Cheruvathur (2015) | 5 | ☆ | / | ☆ | ☆ | / | / | ☆ | / | ☆ |
| Cui (2015) | 6 | ☆ | / | ☆ | ☆ | / | / | ☆ | ☆ | ☆ |
| Gheorghe (2015) | 4 | ☆ | / | ☆ | ☆ | / | / | / | / | ☆ |
| Inao (2015) | 4 | ☆ | / | ☆ | ☆ | / | / | / | / | ☆ |
| Chen (2016) | 9 | ☆ | ☆ | ☆ | ☆ | ☆ | ☆ | ☆ | ☆ | ☆ |
| Sbrancia (2016) | 5 | ☆ | ☆ | ☆ | ☆ | / | / | / | / | ☆ |
| Tonon (2016) | 6 | ☆ | / | ☆ | ☆ | / | / | ☆ | ☆ | ☆ |
| Fujiyama (2017) | 5 | ☆ | / | ☆ | ☆ | / | / | ☆ | / | ☆ |
| Artaza (2018) | 6 | ☆ | / | ☆ | ☆ | / | / | ☆ | ☆ | ☆ |
| Kwon (2018) | 6 | ☆ | / | ☆ | ☆ | / | / | ☆ | ☆ | ☆ |
| La Mura (2018) | 6 | ☆ | / | ☆ | ☆ | / | / | ☆ | ☆ | ☆ |
| Nagaoki (2018) | 6 | ☆ | / | ☆ | ☆ | / | / | ☆ | ☆ | ☆ |
| Scheiner (2018) | 8 | ☆ | ☆ | ☆ | ☆ | ☆ | / | ☆ | ☆ | ☆ |
| Tiwari (2018) | 7 | ☆ | ☆ | ☆ | ☆ | / | / | ☆ | ☆ | ☆ |
| Bergere (2019) | 6 | ☆ | / | ☆ | ☆ | / | / | ☆ | ☆ | ☆ |
| Noronha Ferreira (2019) | 8 | ☆ | ☆ | ☆ | ☆ | ☆ | ☆ | ☆ | ☆ | / |
| Hayama (2019) | 5 | ☆ | / | ☆ | ☆ | / | / | ☆ | / | ☆ |
| [Hayashi](https://www.ncbi.nlm.nih.gov/pubmed/?term=Hayashi%20T%5BAuthor%5D&cauthor=true&cauthor_uid=31842768) (2019) | 5 | ☆ | / | ☆ | ☆ | / | / | ☆ | / | ☆ |
| Pettinari (2019) | 8 | ☆ | ☆ | ☆ | ☆ | ☆ | / | ☆ | ☆ | ☆ |
| Rodriguez-Castro (2019) | 6 | ☆ | / | ☆ | ☆ | / | / | ☆ | ☆ | ☆ |
| Senzolo (2019) | 6 | ☆ | / | ☆ | ☆ | / | / | ☆ | ☆ | ☆ |
| Tarantino (2019) | 5 | ☆ | / | ☆ | ☆ | / | / | / | ☆ | ☆ |
| **Notes:** / indicates no star | | | | | | | | | | |
