# Supplementary material for: Anticoagulation Favors Thrombus Recanalization and Survival in Patients With Liver Cirrhosis and Portal Vein Thrombosis: Results of a Meta-Analysis
Source: Springer Nature journal article supplement (doi:10.1007/s12325-020-01550-4), 2020-11-05
Supplement: MOESM5 [file 18558454]

| **Supplementary table 4. Results of meta-regression analyses** | | | | | | |
| --- | --- | --- | --- | --- | --- | --- |
| **Variables** | **Overall portal vein recanalization** | **Complete portal vein recanalization** | **Thrombus progression** | **Overall bleeding** | **Major bleeding** | **Upper gastrointestinal bleeding** |
| **P value** | **P value** | **P value** | **P value** | **P value** | **P value** |
| Publication year (Before 2015 vs. After 2015) | ***0.049*** | 0.649 | 0.182 | ***0.033*** | 0.848 | 0.201 |
| Region (America vs. Asia vs. Europe) | 0.722 | 0.159 | 0.073 | 0.786 | 0.655 | 0.397 |
| Study design (Prospective vs. Retrospective) | 0.655 | 0.105 | 0.858 | 0.201 | 0.368 | 0.392 |
| Study design (Comparative cohort vs. Single arm cohort) | 0.059 | 0.630 | 0.649 | 0.771 | 0.435 | 0.091 |
| Study quality (High vs. Moderate) | 0.095 | 0.729 | 0.540 | 0.868 | 0.780 | 0.126 |
| Excluding HCC (Yes vs. No) | 0.491 | 0.119 | 0.735 | 0.812 | 0.328 | 0.790 |
| Excluding CTPV (Yes vs. No) | 0.934 | 0.066 | 0.248 | 0.621 | 0.975 | 0.542 |
| Excluding isolated thrombosis within SMV or SV (Yes vs. No) | 0.068 | 0.592 | 0.630 | 0.662 | 0.405 | 0.434 |
| Excluding patients who received antiplatelet treatment (Yes vs. No) | 0.796 | 0.491 | 0.792 | 0.876 | 0.909 | 0.420 |
| Excluding patients who received thrombolytic treatment (Yes vs. No) | 0.150 | - | 0.970 | 0.184 | - | - |
| Type of anticoagulants (LMWH vs. VKAs vs. Fondaparinux vs. DOACs vs. LMWH followed by VKAs vs. LMWH in combination with antithrombin) | 0.140 | 0.562 | 0.170 | 0.558 | 0.178 | 0.303 |
| **Abbreviations:** HCC: Hepatocellular carcinoma; CTPV: Cavernous transformation of portal vein; SMV: Superior mesenteric vein; SV: Splenic vein; LMWH: Low molecular weight heparin; VKAs: Vitamin K antagonists; DOACs: Direct-acting oral anticoagulants. | | | | | | |
