# Supplementary material for: Anticoagulation Favors Thrombus Recanalization and Survival in Patients With Liver Cirrhosis and Portal Vein Thrombosis: Results of a Meta-Analysis
Source: Springer Nature journal article supplement (doi:10.1007/s12325-020-01550-4), 2020-11-05
Supplement: MOESM7 [file 18558454]

| **Supplementary table 6. Results of sensitivity analyses** | | |
| --- | --- | --- |
| **Study omitted** | **Proportion; 95%CI** | ***I2*; P value** |
| **Overall portal vein recanalization** | | |
| Francoz (2005) | 0.723 (0.669-0.774) | 77.0%; P<0.0001 |
| Amitrano (2010) | 0.712 (0.656-0.765) | 77.9%; P<0.0001 |
| Butera (2010) | 0.708 (0.654-0.761) | 77.2%; P<0.0001 |
| Bento (2011) | 0.718 (0.662-0.770) | 78.1%; P<0.0001 |
| Delgado (2012) | 0.719 (0.663-0.772) | 77.7%; P<0.0001 |
| Senzolo (2012) | 0.718 (0.662-0.771) | 78.0%; P<0.0001 |
| Takatori (2013) | 0.707 (0.652-0.759) | 76.4%; P<0.0001 |
| Werner (2013) | 0.712 (0.656-0.765) | 77.9%; P<0.0001 |
| Chung (2014) | 0.714 (0.658-0.766) | 78.1%; P<0.0001 |
| Cheruvathur (2015) | 0.711 (0.655-0.764) | 77.5%; P<0.0001 |
| Cui (2015) | 0.712 (0.656-0.766) | 77.8%; P<0.0001 |
| Gheorghe (2015) | 0.696 (0.652-0.738) | 62.6%; P<0.0001 |
| Inao (2015) | 0.719 (0.663-0.771) | 77.9%; P<0.0001 |
| Chen (2016) | 0.722 (0.667-0.773) | 77.2%; P<0.0001 |
| Sbrancia (2016) | 0.715 (0.659-0.767) | 78.2%; P<0.0001 |
| Tonon (2016) | 0.717 (0.661-0.770) | 78.1%; P<0.0001 |
| Fujiyama (2017) | 0.713 (0.656-0.766) | 77.9%; P<0.0001 |
| Artaza (2018) | 0.715 (0.659-0.768) | 78.2%; P<0.0001 |
| Kwon (2018) | 0.719 (0.662-0.772) | 77.7%; P<0.0001 |
| La Mura (2018) | 0.716 (0.659-0.770) | 78.2%; P<0.0001 |
| Nagaoki (2018) | 0.721 (0.666-0.773) | 77.0%; P<0.0001 |
| Tiwari (2018) | 0.713 (0.657-0.766) | 78.0%; P<0.0001 |
| Bergere (2019) | 0.711 (0.655-0.764) | 77.6%; P<0.0001 |
| Noronha Ferreira (2019) | 0.722 (0.667-0.773) | 77.1%; P<0.0001 |
| Hayama (2019) | 0.714 (0.657-0.767) | 78.1%; P<0.0001 |
| Pettinari (2019) | 0.721 (0.665-0.773) | 78.6%; P<0.0001 |
| Rodriguez-Castro (2019) | 0.717 (0.661-0.771) | 78.1%; P<0.0001 |
| Senzolo (2019) | 0.713 (0.657-0.766) | 78.0%; P<0.0001 |
| Tarantinoi (2019) | 0.720 (0.663-0.773) | 77.4%; P<0.0001 |
| **Complete portal vein recanalization** | | |
| Francoz (2005) | 0.408 (0.350-0.466) | 76.0%; P<0.0001 |
| Amitrano (2010) | 0.396 (0.343-0.450) | 72.0%; P<0.0001 |
| Butera (2010) | 0.411 (0.353-0.469) | 75.9%; P<0.0001 |
| Bento (2011) | 0.406 (0.349-0.465) | 75.9%; P<0.0001 |
| Delgado (2012) | 0.406 (0.348-0.466) | 75.8%; P<0.0001 |
| Senzolo (2012) | 0.410 (0.352-0.469) | 76.0%; P<0.0001 |
| Caracciolo (2013) | 0.402 (0.346-0.459) | 75.2%; P<0.0001 |
| Werner (2013) | 0.409 (0.351-0.467) | 76.0%; P<0.0001 |
| Chung (2014) | 0.407 (0.350-0.466) | 76.0%; P<0.0001 |
| Risso (2014) | 0.393 (0.343-0.444) | 68.1%; P<0.0001 |
| Cheruvathur (2015) | 0.409 (0.351-0.468) | 76.0%; P<0.0001 |
| Cui (2015) | 0.415 (0.357-0.473) | 74.7%; P<0.0001 |
| Gheorghe (2015) | 0.419 (0.365-0.474) | 71.7%; P<0.0001 |
| Inao (2015) | 0.415 (0.358-0.473) | 74.8%; P<0.0001 |
| Tonon (2016) | 0.407 (0.349-0.467) | 76.0%; P<0.0001 |
| Fujiyama (2017) | 0.411 (0.353-0.471) | 75.8%; P<0.0001 |
| Artaza (2018) | 0.404 (0.347-0.462) | 75.4%; P<0.0001 |
| Kwon (2018) | 0.417 (0.361-0.473) | 72.6%; P<0.0001 |
| La Mura (2018) | 0.405 (0.347-0.464) | 75.4%; P<0.0001 |
| Nagaoki (2018) | 0.409 (0.350-0.468) | 76.0%; P<0.0001 |
| Tiwari (2018) | 0.407 (0.350-0.466) | 76.0%; P<0.0001 |
| Bergere (2019) | 0.402 (0.345-0.459) | 74.7%; P<0.0001 |
| Noronha Ferreira (2019) | 0.417 (0.362-0.474) | 73.8%; P<0.0001 |
| Hayama (2019) | 0.411 (0.353-0.470) | 75.9%; P<0.0001 |
| Pettinari (2019) | 0.409 (0.351-0.470) | 76.0%; P<0.0001 |
| Rodriguez-Castro (2019) | 0.407 (0.349-0.467) | 75.9%; P<0.0001 |
| Tarantinoi (2019) | 0.407 (0.348-0.467) | 75.8%; P<0.0001 |
| **Thrombus progression** | | |
| Francoz (2005) | 0.068 (0.030-0.122) | 85.8%; P<0.0001 |
| Butera (2010) | 0.072 (0.032-0.126) | 85.5%; P<0.0001 |
| Delgado (2012) | 0.075 (0.035-0.129) | 84.2%; P<0.0001 |
| Senzolo (2012) | 0.064 (0.027-0.116) | 85.5%; P<0.0001 |
| Werner (2013) | 0.073 (0.033-0.127) | 85.2%; P<0.0001 |
| Chung (2014) | 0.067 (0.029-0.120) | 85.8%; P<0.0001 |
| Cheruvathur (2015) | 0.075 (0.035-0.128) | 84.6%; P<0.0001 |
| Cui (2015) | 0.067 (0.028-0.121) | 85.7%; P<0.0001 |
| Gheorghe (2015) | 0.075 (0.035-0.128) | 84.5%; P<0.0001 |
| Inao (2015) | 0.064 (0.027-0.116) | 85.4%; P<0.0001 |
| Chen (2016) | 0.066 (0.028-0.119) | 85.7%; P<0.0001 |
| Artaza (2018) | 0.074 (0.034-0.128) | 85.1%; P<0.0001 |
| Kwon (2018) | 0.058 (0.027-0.099) | 78.1%; P<0.0001 |
| Nagaoki (2018) | 0.059 (0.025-0.106) | 82.8%; P<0.0001 |
| Bergere (2019) | 0.069 (0.030-0.123) | 85.8%; P<0.0001 |
| Pettinari (2019) | 0.067 (0.028-0.122) | 85.8%; P<0.0001 |
| Rodriguez-Castro (2019) | 0.075 (0.036-0.129) | 83.7%; P<0.0001 |
| Tarantinoi (2019) | 0.066 (0.027-0.122) | 85.7%; P<0.0001 |
| **Overall bleeding** | | |
| Francoz (2005) | 0.104 (0.063-0.153) | 80.6%; P<0.0001 |
| Amitrano (2010) | 0.109 (0.069-0.158) | 79.2%; P<0.0001 |
| Butera (2010) | 0.107 (0.067-0.156) | 80.0%; P<0.0001 |
| Bento (2011) | 0.109 (0.069-0.158) | 79.2%; P<0.0001 |
| Delgado (2012) | 0.103 (0.062-0.153) | 80.6%; P<0.0001 |
| Senzolo (2012) | 0.101 (0.061-0.151) | 80.6%; P<0.0001 |
| Caracciolo (2013) | 0.106 (0.066-0.155) | 80.2%; P<0.0001 |
| Takatori (2013) | 0.109 (0.069-0.158) | 79.2%; P<0.0001 |
| Werner (2013) | 0.105 (0.065-0.155) | 80.3%; P<0.0001 |
| Chung (2014) | 0.107 (0.066-0.156) | 80.1%; P<0.0001 |
| Risso (2014) | 0.100 (0.060-0.149) | 80.5%; P<0.0001 |
| Cheruvathur (2015) | 0.099 (0.059-0.148) | 80.4%; P<0.0001 |
| Cui (2015) | 0.100 (0.060-0.150) | 80.5%; P<0.0001 |
| Chen (2016) | 0.097 (0.058-0.144) | 79.7%; P<0.0001 |
| Sbrancia (2016) | 0.097 (0.059-0.144) | 79.9%; P<0.0001 |
| Tonon (2016) | 0.101 (0.060-0.150) | 80.6%; P<0.0001 |
| Fujiyama (2017) | 0.112 (0.073-0.158) | 75.8%; P<0.0001 |
| Artaza (2018) | 0.103 (0.062-0.152) | 80.6%; P<0.0001 |
| Kwon (2018) | 0.100 (0.059-0.151) | 80.5%; P<0.0001 |
| La Mura (2018) | 0.095 (0.058-0.139) | 76.6%; P<0.0001 |
| Scheiner (2018) | 0.107 (0.067-0.156) | 80.0%; P<0.0001 |
| Bergere (2019) | 0.094 (0.058-0.139) | 77.3%; P<0.0001 |
| Pettinari (2019) | 0.098 (0.059-0.147) | 79.8%; P<0.0001 |
| Rodriguez-Castro (2019) | 0.105 (0.063-0.155) | 80.3%; P<0.0001 |
| **Major bleeding** | | |
| Francoz (2005) | 0.026 (0.013-0.044) | 45.1%; P=0.0203 |
| Amitrano (2010) | 0.029 (0.014-0.048) | 45.1%; P=0.0200 |
| Butera (2010) | 0.028 (0.014-0.047) | 46.2%; P=0.0170 |
| Bento (2011) | 0.029 (0.014-0.048) | 45.1%; P=0.0200 |
| Delgado (2012) | 0.026 (0.012-0.044) | 43.8%; P=0.0245 |
| Caracciolo (2013) | 0.028 (0.014-0.046) | 46.4%; P=0.0164 |
| Takatori (2013) | 0.029 (0.014-0.048) | 45.1%; P=0.0200 |
| Werner (2013) | 0.029 (0.014-0.048) | 45.1%; P=0.0200 |
| Chung (2014) | 0.028 (0.014-0.047) | 46.3%; P=0.0166 |
| Risso (2014) | 0.030 (0.015-0.049) | 42.2%; P=0.0307 |
| Gheorghe (2015) | 0.024 (0.012-0.041) | 34.3%; P=0.0770 |
| Tonon (2016) | 0.029 (0.015-0.049) | 43.4%; P=0.0260 |
| Fujiyama (2017) | 0.030 (0.016-0.049) | 40.0%; P=0.0411 |
| Kwon (2018) | 0.026 (0.012-0.045) | 44.6%; P=0.0219 |
| La Mura (2018) | 0.023 (0.012-0.037) | ***17.7%; P=0.2418*** |
| Scheiner (2018) | 0.028 (0.014-0.047) | 46.2%; P=0.0170 |
| Hayashi (2019) | 0.030 (0.015-0.049) | 41.9%; P=0.0321 |
| Rodriguez-Castro (2019) | 0.027 (0.012-0.046) | 46.3%; P=0.0167 |
| Senzolo (2019) | 0.027 (0.013-0.046) | 46.4%; P=0.0463 |
| **Upper gastrointestinal bleeding** | | |
| Francoz (2005) | 0.030 (0.016-0.050) | 40.1%; P=0.0447 |
| Amitrano (2010) | 0.033 (0.018-0.054) | 39.5%; P=0.0481 |
| Butera (2010) | 0.032 (0.017-0.053) | 41.1%; P=0.0398 |
| Bento (2011) | 0.033 (0.018-0.054) | 39.5%; P=0.0481 |
| Senzolo (2012) | 0.031 (0.016-0.051) | 41.1%; P=0.0382 |
| Caracciolo (2013) | 0.032 (0.017-0.052) | 41.1%; P=0.0382 |
| Takatori (2013) | 0.033 (0.018-0.054) | 39.5%; P=0.0481 |
| Werner (2013) | 0.033 (0.018-0.054) | 39.5%; P=0.0481 |
| Chung (2014) | 0.032 (0.017-0.052) | 41.3%; P=0.0389 |
| Cui (2015) | 0.036 (0.020-0.056) | ***30.9%; P=0.1097*** |
| Fujiyama (2017) | 0.036 (0.020-0.056) | ***31.5%; P=0.1045*** |
| Artaza (2018) | 0.030 (0.015-0.049) | 38.8%; P=0.0519 |
| La Mura (2018) | 0.028 (0.014-0.047) | 32.5%; P=0.0965 |
| Nagaoki (2018) | 0.031 (0.015-0.051) | 40.9%; P=0.0409 |
| Scheiner (2018) | 0.032 (0.017-0.053) | 41.1%; P=0.0398 |
| Bergere (2019) | 0.028 (0.015-0.045) | ***23.7%; P=0.1797*** |
| Pettinari (2019) | 0.028 (0.014-0.047) | ***31.9%; P=0.1015*** |
| Rodriguez-Castro (2019) | 0.033 (0.016-0.054) | 40.9%; P=0.0406 |
| **Abbreviations**: CI: Confidence interval. | | |
