# Supplementary material for: Anticoagulation Favors Thrombus Recanalization and Survival in Patients With Liver Cirrhosis and Portal Vein Thrombosis: Results of a Meta-Analysis
Source: Springer Nature journal article supplement (doi:10.1007/s12325-020-01550-4), 2020-11-05
Supplement: MOESM8 [file 18558454]

| **Supplementary table 7. Thrombus progression and overall bleeding after anticoagulation: Results of subgroup analyses** | | | | | | | | | | | | | |
| --- | --- | --- | --- | --- | --- | --- | --- | --- | --- | --- | --- | --- | --- |
| **Groups** | **Thrombus progression** | | | | | |  | **Overall bleeding** | | | | | |
| **No. Studies** | **Pooled Proportion Using Random-effects Model** | **Heterogeneity** | |  | **Publication Bias** | **No. Studies** | **Pooled Proportion Using Random-effects Model** | **Heterogeneity** | |  | **Publication Bias** |
| ***I2*** | **P value** | **P value** | ***I2*** | **P value** | **P value** |
| **Total** | 18 | 0.069 (95%CI=0.031-0.120) | 84.9% | <0.0001 |  | 0.0008 |  | 24 | 0.103 (95%CI=0.064-0.150) | 79.8% | <0.0001 |  | 0.0002 |
| **Publication year** | | | | | | | | | | | | | |
| Before 2015 | 10 | 0.045 (95%CI=0.014-0.093) | 70.4% | 0.0004 |  | 0.0104 |  | 13 | 0.066 (95%CI=0.033-0.110) | 61.4% | 0.0019 |  | 0.0546 |
| After 2015 | 8 | 0.100 (95%CI=0.033-0.199) | 89.5% | <0.0001 |  | 0.0138 |  | 11 | 0.157 (95%CI=0.083-0.248) | 85.8% | <0.0001 |  | 0.0010 |
| **Region** | | | | | | | | | | | | | |
| America | 1 | 0.009 (95%CI=0.008-0.074) | - | - |  | - |  | 1 | 0.050 (95%CI=0.002-0.158) | - | - |  | - |
| Asia | 7 | 0.139 (95%CI=0.054-0.256) | 86.2% | <0.0001 |  | 0.0537 |  | 7 | 0.090 (95%CI=0.027-0.185) | 84.5% | <0.0001 |  | 0.0345 |
| Europe | 10 | 0.039 (95%CI=0.013-0.079) | 70.9% | 0.0003 |  | 0.0227 |  | 16 | 0.113 (95%CI=0.063-0.175) | 78.7% | <0.0001 |  | 0.0111 |
| **Study design** | | | | | | | | | | | | | |
| Retrospective | 9 | 0.067 (95%CI=0.022-0.133) | 82.2% | <0.0001 |  | 0.0157 |  | 13 | 0.131 (95%CI=0.064-0.217) | 85.2% | <0.0001 |  | 0.0042 |
| Prospective | 9 | 0.070 (95%CI=0.015-0.016) | 87.9% | <0.0001 |  | 0.0396 |  | 11 | 0.076 (95%CI=0.040-0.123) | 61.8% | 0.0035 |  | 0.0490 |
| Comparative cohort | 5 | 0.015 (95%CI=0.065-0.154) | 0% | 0.8437 |  | 0.8588 |  | 9 | 0.126 (95%CI=0.067-0.202) | 63.0% | 0.0057 |  | 0.4717 |
| Single arm cohort | 13 | 0.057 (95%CI=0.016-0.121) | 89.0% | <0.0001 |  | 0.0029 |  | 15 | 0.093 (95%CI=0.045-0.155) | 84.2% | <0.0001 |  | 0.0009 |
| **Study quality** | | | | | | | | | | | | | |
| Moderate | 14 | 0.058 (95%CI=0.018-0.119) | 88.1% | <0.0001 |  | 0.0036 |  | 18 | 0.104 (95%CI=0.058-0.160) | 82.2% | <0.0001 |  | 0.0002 |
| High | 4 | 0.109 (95%CI=0.066-0.162) | 0% | 0.7731 |  | 0.6231 |  | 6 | 0.101 (95%CI=0.032-0.202) | 71.0% | 0.0041 |  | 0.9009 |
| **Excluding HCC** | | | | | | | | | | | | | |
| Yes | 5 | 0.057 (95%CI=0.010-0.140) | 78.2% | 0.0010 |  | 0.0368 |  | 10 | 0.094(95%CI=0.037-0.174) | 81.1% | <0.0001 |  | 0.0470 |
| No | 13 | 0.073 (95%CI=0.026-0.140) | 86.7% | <0.0001 |  | 0.0097 |  | 14 | 0.109 (95%CI=0.058-0.173) | 80.3% | <0.0001 |  | 0.0028 |
| **Excluding CTPV** | | | | | | | | | | | | | |
| Yes | 6 | 0.038 (95%CI=0.008-0.086) | 63.1% | 0.0186 |  | 0.0547 |  | 9 | 0.123(95%CI=0.060-0.205) | 76.0% | <0.0001 |  | 0.0216 |
| No | 12 | 0.087 (95%CI=0.033-0.164) | 87.6% | <0.0001 |  | 0.0069 |  | 15 | 0.091 (95%CI=0.044-0.153) | 82.3% | <0.0001 |  | 0.0074 |
| **Excluding isolated thrombosis within SMV or SV** | | | | | | | | | | | | | |
| Yes | 4 | 0.048 (95%CI=0.002-0.151) | 80.5% | 0.0015 |  | 0.0930 |  | 4 | 0.131 (95%CI=0.061-0.222) | 57.6% | 0.0697 |  | 0.0971 |
| No | 14 | 0.075 (95%CI=0.031-0.136) | 85.6% | <0.0001 |  | 0.0057 |  | 20 | 0.096 (95%CI=0.053-0.151) | 82.2% | <0.0001 |  | 0.0016 |
| **Excluding patients who received antiplatelet treatment** | | | | | | | | | | | | | |
| Yes | 3 | 0.066 (95%CI=0.003-0.202) | 85.8% | 0.0009 |  | - |  | 3 | 0.115 (95%CI=0.062-0.181) | 32.4% | 0.2276 |  | 0.0007 |
| No | 15 | 0.069 (95%CI=0.027-0.128) | 85.5% | <0.0001 |  | 0.0053 |  | 21 | 0.100 (95%CI=0.056-0.155) | 81.9% | <0.0001 |  | 0.0053 |
| **Excluding patients who received thrombolytic treatment** | | | | | | | | | | | | | |
| Yes | 1 | 0.112 (95%CI=0.027-0.245) | - | - |  | - |  | 1 | 0.274 (95%CI=0.134-0.442) | - | - |  | - |
| No | 17 | 0.066 (95%CI=0.028-0.119) | 85.7% | <0.0001 |  | 0.0012 |  | 23 | 0.097 (95%CI=0.058-0.144) | 79.7% | <0.0001 |  | 0.0005 |
| **Type of anticoagulants** | | | | | | | | | | | | | |
| LMWH | 4 | 0.116 (95%CI=0.011-0.309) | 93.3% | <0.0001 |  | 0.1323 |  | 7 | 0.065 (95%CI=0.020-0.134) | 78.4% | 0.0001 |  | 0.0837 |
| VKAs | 3 | 0.059 (95%CI=0.006-0.160) | 51.7% | 0.1262 |  | - |  | 3 | 0.094 (95%CI=0.003-0.288) | 79.3% | 0.0080 |  | - |
| Fondaparinux | 0 | - | - | - |  | - |  | 1 | 0.151 (95%CI=0.061-0.272) | - | - |  | - |
| DOACs | 1 | 0.070 (95%CI=0.003-0.214) | - | - |  | - |  | 0 | - | - | - |  | *-* |
| LMWH followed by VKAs | 2 | 0.245 (95%CI=0.002-0.697) | - | 0.0008 |  | - |  | 2 | 0.196 (95%CI=0.015-0.510) | - | 0.0071 |  | - |
| LMWH in combination with antithrombin | 1 | 0.162 (95%CI=0.066-0.291) | - | - |  | - |  | 0 | - | - | - |  | *-* |
| **Abbreviations:** CI: Confidence interval; HCC: Hepatocellular carcinoma; CTPV: Cavernous transformation of portal vein; SMV: Superior mesenteric vein; SV: Splenic vein; LMWH: Low molecular weight heparin; VKAs: Vitamin K antagonists; DOACs: Direct-acting oral anticoagulants. | | | | | | | | | | | | | |
