# Supplementary material for: Anticoagulation Favors Thrombus Recanalization and Survival in Patients With Liver Cirrhosis and Portal Vein Thrombosis: Results of a Meta-Analysis
Source: Springer Nature journal article supplement (doi:10.1007/s12325-020-01550-4), 2020-11-05
Supplement: MOESM9 [file 18558454]

| **Supplementary table 8. Major bleeding and upper gastrointestinal bleeding after anticoagulation: Results of subgroup analyses** | | | | | | | | | | | | | |
| --- | --- | --- | --- | --- | --- | --- | --- | --- | --- | --- | --- | --- | --- |
| **Groups** | **Major bleeding** | | | | | |  | **Upper gastrointestinal bleeding** | | | | | |
| **No. Studies** | **Pooled Proportion Using Random-effects Model** | **Heterogeneity** | |  | **Publication Bias** | **No. Studies** | **Pooled Proportion Using Random-effects Model** | **Heterogeneity** | |  | **Publication Bias** |
| ***I2*** | **P value** | **P value** | ***I2*** | **P value** | **P value** |
| **Total** | 19 | 0.028 (95%CI=0.014-0.046) | 43.3% | 0.0235 |  | 0.0499 |  | 18 | 0.032 (95%CI=0.017-0.051) | 38.0% | 0.0524 |  | 0.0347 |
| **Publication year** | | | | | | | | | | | | | |
| Before 2015 | 11 | 0.027 (95%CI=0.010-0.050) | 24.0% | 0.2149 |  | 0.2052 |  | 10 | 0.014 (95%CI=0.004-0.031) | 0% | 0.8970 |  | 0.1866 |
| After 2015 | 8 | 0.029 (95%CI=0.008-0.060) | 62.2% | 0.0098 |  | 0.0737 |  | 8 | 0.050 (95%CI=0.023-0.087) | 55.0% | 0.0297 |  | 0.0230 |
| **Region** | | | | | | | | | | | | | |
| America | 1 | 0.009 (95%CI=0.008-0.074) | - | - |  | - |  | 1 | 0.009 (95%CI=0.008-0.074) | - | - |  | - |
| Asia | 5 | 0.015 (95%CI=0.002-0.039) | 25.5% | 0.2515 |  | 0.6631 |  | 5 | 0.011 (95%CI=0.002-0.029) | 0% | 0.4330 |  | 0.4213 |
| Europe | 13 | 0.036 (95%CI=0.017-0.063) | 46.2% | 0.0340 |  | 0.0965 |  | 12 | 0.048 (95%CI=0.028-0.074) | 22.1% | 0.2265 |  | 0.3649 |
| **Study design** | | | | | | | | | | | | | |
| Retrospective | 10 | 0.022 (95%CI=0.006-0.049) | 51.5% | 0.0293 |  | 0.2110 |  | 10 | 0.040 (95%CI=0.017-0.071) | 48.6% | 0.0411 |  | 0.1549 |
| Prospective | 9 | 0.034 (95%CI=0.014-0.062) | 33.9% | 0.1464 |  | 0.2765 |  | 8 | 0.019 (95%CI=0.006-0.040) | 0% | 0.4329 |  | 0.0694 |
| Comparative cohort | 6 | 0.012 (95%CI=0.001-0.034) | 0% | 0.7143 |  | 0.3197 |  | 6 | 0.052 (95%CI=0.025-0.090) | 0% | 0.6987 |  | 0.1040 |
| Single arm cohort | 13 | 0.032 (95%CI=0.015-0.057) | 52.7% | 0.0132 |  | 0.0449 |  | 12 | 0.027 (95%CI=0.010-0.051) | 50.2% | 0.0237 |  | 0.0251 |
| **Study quality** | | | | | | | | | | | | | |
| Moderate | 16 | 0.028 (95%CI=0.013-0.049) | 52.2% | 0.0078 |  | 0.0123 |  | 13 | 0.029 (95%CI=0.012-0.052) | 47.8% | 0.0278 |  | 0.0156 |
| High | 3 | 0.017 (95%CI=0.000-0.075) | 0% | 0.9952 |  | ***-*** |  | 5 | 0.050 (95%CI=0.022-0.089) | 0% | 0.5840 |  | 0.0302 |
| **Excluding HCC** | | | | | | | | | | | | | |
| Yes | 6 | 0.035 (95%CI=0.007-0.082) | 53.6% | 0.0560 |  | 0.7759 |  | 9 | 0.027 (95%CI=0.011-0.051) | 24.7% | 0.2236 |  | 0.1988 |
| No | 13 | 0.024 (95%CI=0.010-0.044) | 37.7% | 0.0827 |  | 0.0538 |  | 9 | 0.036 (95%CI=0.013-0.071) | 50.2% | 0.0413 |  | 0.1503 |
| **Excluding CTPV** | | | | | | | | | | | | | |
| Yes | 5 | 0.021 (95%CI=0.005-0.048) | 0% | 0.4070 |  | 0.6614 |  | 6 | 0.030 (95%CI=0.004-0.081) | 61.2% | 0.0244 |  | 0.6170 |
| No | 14 | 0.030 (95%CI=0.013-0.054) | 52.0% | 0.0122 |  | 0.0605 |  | 12 | 0.033 (95%CI=0.017-0.055) | 23.2% | 0.2161 |  | 0.2120 |
| **Excluding isolated thrombosis within SMV or SV** | | | | | | | | | | | | | |
| Yes | 1 | 0.038 (95%CI=0.006-0.096) | - | - |  | - |  | 3 | 0.038 (95%CI=0.012-0.077) | 0% | 0.4778 |  | - |
| No | 18 | 0.027 (95%CI=0.012-0.046) | 46.3% | 0.0167 |  | 0.0549 |  | 15 | 0.029 (95%CI=0.013-0.052) | 45.7% | 0.0274 |  | 0.0831 |
| **Excluding patients who received antiplatelet treatment** | | | | | | | | | | | | | |
| Yes | 1 | 0.038 (95%CI=0.006-0.096) | - | - |  | - |  | 3 | 0.016 (95%CI=0.002-0.042) | 7.5% | 0.3392 |  | - |
| No | 18 | 0.027 (95%CI=0.012-0.046) | 46.3% | 0.0167 |  | 0.0594 |  | 15 | 0.036 (95%CI=0.018-0.060) | 37.8% | 0.0685 |  | 0.1071 |
| **Type of anticoagulants** | | | | | | | | | | | | | |
| LMWH | 5 | 0.024 (95%CI=0.008-0.049) | 16.8% | 0.3074 |  | 0.6296 |  | 6 | 0.012 (95%CI=0.002-0.028) | 0% | 0.7004 |  | 0.7419 |
| VKAs | 2 | 0.011 (95%CI=0.002-0.063) | - | 0.8151 |  | - |  | 2 | 0.011 (95%CI=0.002-0.063) | - | 0.8151 |  | - |
| Fondaparinux | 2 | 0.017 (95%CI=0.000-0.058) | - | 0.2996 |  | - |  | 0 | - | - | - |  | - |
| DOACs | 0 | - | - | - |  | - |  | 1 | 0.012 (95%CI=0.011-0.101) | - | - |  | - |
| LMWH followed by VKAs | 2 | 0.117 (95%CI=0.058-0.194) | - | 0.4384 |  | - |  | 3 | 0.082 (95%CI=0.039-0.139) | 0% | 0.9820 |  | - |
| **Abbreviations:** CI: Confidence interval; HCC: Hepatocellular carcinoma; CTPV: Cavernous transformation of portal vein; SMV: Superior mesenteric vein; SV: Splenic vein; LMWH: Low molecular weight heparin; VKAs: Vitamin K antagonists; DOACs: Direct-acting oral anticoagulants. | | | | | | | | | | | | | |
